# Supplementary material for: State Mental Health Policy: Washington State's Initiative to Disseminate and Implement High-Fidelity ACT Teams
Source: Atypon-hosted journal article supplement (doi:10.1176/ps.2009.60.1.24), 2009-01-01
Supplement: pss_60_01_024_01.pdf [file pss_60_01_024_01.pdf]

WA State's Initiative 1

*Table 1: Key Enhancements to the National Program Standards for ACT Teams*

| Enhancements                              | WA-PACT Program Standards                                                                                                                                                           | National ACT Program Standards                                                         |
|-------------------------------------------|-------------------------------------------------------------------------------------------------------------------------------------------------------------------------------------|----------------------------------------------------------------------------------------|
| Psychiatric Prescriber                    | Allows ARNP or CNS to substitute for the psychiatrist                                                                                                                               | Psychiatrist required                                                                  |
| Peer Counselor Certification              | Peer Specialist must be certified by the WA State Peer Counselor Certification program within one year of PACT employment                                                           | No peer counselor certification or minimum training requirements specified             |
| Co-occurring Disorders Services           | A more fully articulated set of assessment and treatment interventions following an integrated, stage wise approach to services                                                     | While focused on stage wise treatment, interventions are not well-specified            |
| Wellness Management and Recovery Services | Specifies a range of wellness management strategies, inclusive of evidence-based approaches such as Wellness Recovery Action Plans (WRAP) and Illness Management and Recovery (IMR) | Minimal specification of peer support services (e.g., peer counseling, self-help) only |
| Strengths-Based Assessment                | Added one domain of assessment of consumers' strengths and resources. Provided guidelines for facilitating a strengths-based approach to the required ACT Comprehensive Assessment  | Not included                                                                           |
